# Supplementary material for: Paradoxical imbalance between activated lymphocyte protein synthesis capacity and rapid division rate
Source: eLife journal article supplement (doi:10.7554/elife.89015), 2023-08-14

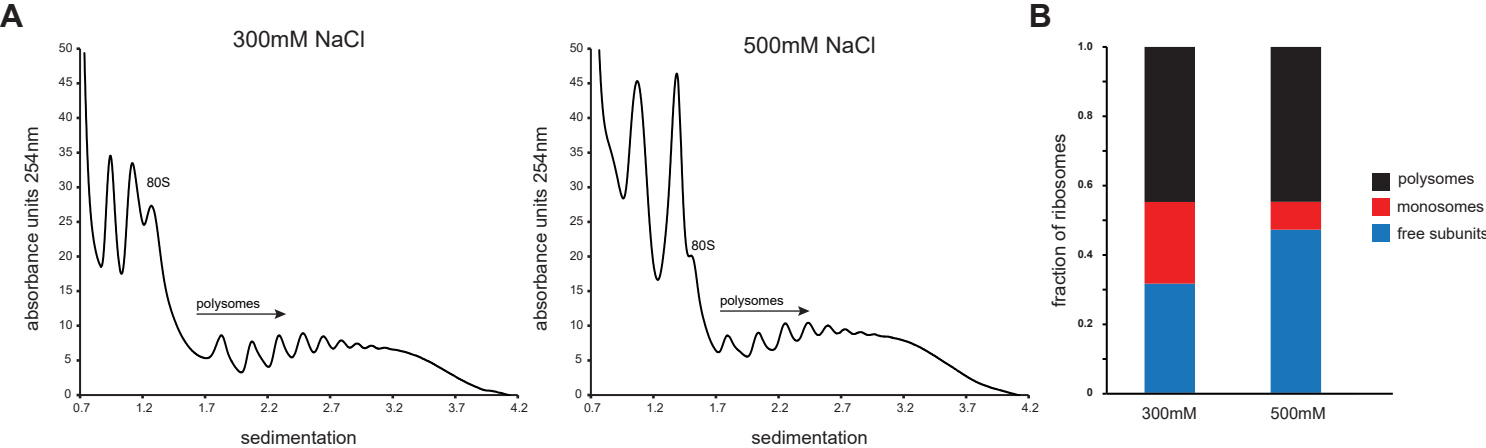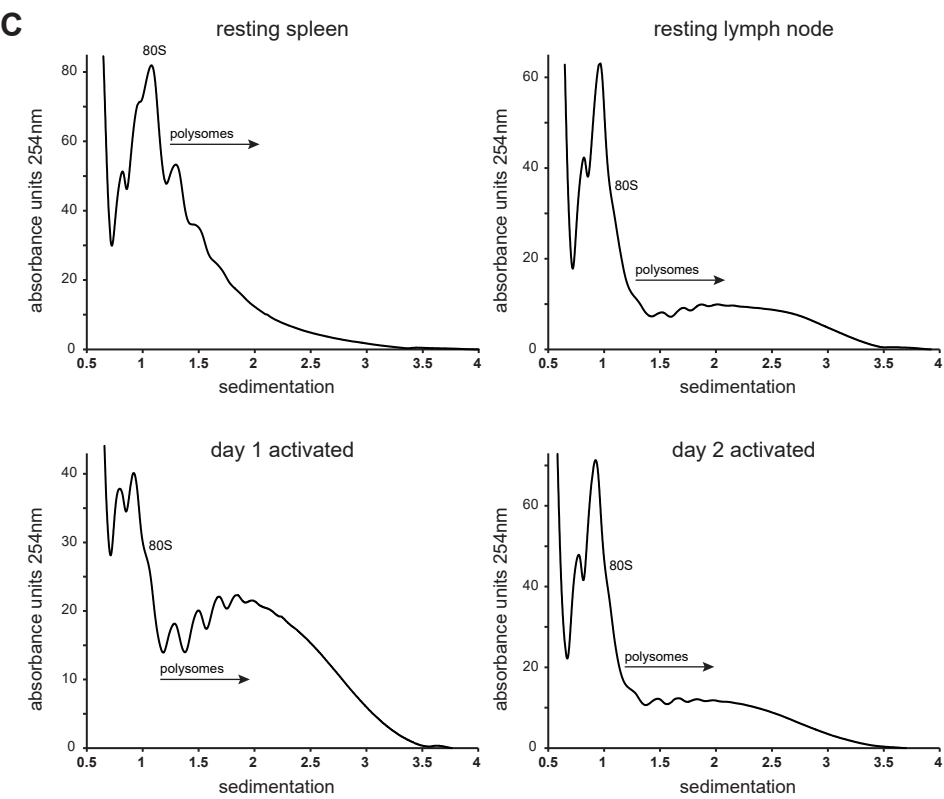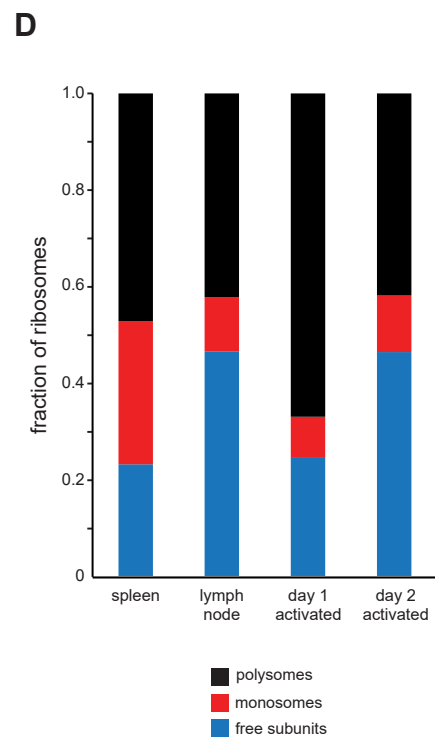

Supplement: fig5-figsupp2-data1 [file elife-89015-fig5-figsupp2-data1-v1.pdf]
