# Supplementary material for: Paradoxical imbalance between activated lymphocyte protein synthesis capacity and rapid division rate
Source: eLife. 2024 Mar 21;12:RP89015. doi: 10.7554/eLife.89015 (PMC10957176; doi:10.7554/eLife.89015)
Supplement: Figure 1—figure supplement 1—source data 1. [file elife-89015-fig1-figsupp1-data1.xlsx]

## Sheet: Figure 1-figure supplement 1A
Figure 1-figure supplement 1 source data
donor 2 left
		- PMA/I CD19+	-PMA/I CD4+	-PMA/I CD8+	+PMA/I CD19+	+PMA/I CD4+	+PMA/I CD8+
Day 2		15	40	16	22	14	11
Day 5		9	39	16	25	14	22
donor 2 right
		- PMA/I CD19+	-PMA/I CD4+	-PMA/I CD8+	+PMA/I CD19+	+PMA/I CD4+	+PMA/I CD8+
Day 2		1044	1024.5	1019.5	6341	5774.5	4607.5
Day 5		1337	1023.5	1147.5	3891.5	6113.5	5159.5
donor 3 left
		- PMA/I CD19+	-PMA/I CD4+	-PMA/I CD8+	+PMA/I CD19+	+PMA/I CD4+	+PMA/I CD8+
Day 2		3	37	13	11	3	5
Day 5		4	36	17	10	35	28
donor 3 right
		- PMA/I CD19+	-PMA/I CD4+	-PMA/I CD8+	+PMA/I CD19+	+PMA/I CD4+	+PMA/I CD8+
Day 2		709	1048	935	2474	6567.5	7787.5
Day 5		1759.5	2169.5	1786	3945.15	6560	5593.5
