# Supplementary material for: Paradoxical imbalance between activated lymphocyte protein synthesis capacity and rapid division rate
Source: eLife. 2024 Mar 21;12:RP89015. doi: 10.7554/eLife.89015 (PMC10957176; doi:10.7554/eLife.89015)
Supplement: Figure 1—figure supplement 2—source data 1. [file elife-89015-fig1-figsupp2-data1.xlsx]

## Sheet: Fig1-figure supplement 2C
Figure 1-figure supplement 2C source data
		BL6 resting VEH			BL6 resting CHX
AUC:		0.667473	40S/60S		0.482846	40S/60S
		2.79106	monosomes		2.40277	80S
		2.42499	polysomes		2.31663	polysomes
fractions:		0.113448	40S/60S		0.0928148	40S/60S
		0.474386	monosomes		0.461872	monosomes
		0.412167	polysomes		0.445313	polysomes
percentage:		11.3448	40S/60S		9.28148	40S/60S
		47.4386	monosomes		46.1872	monosomes
		41.2167	polysomes		44.5313	polysomes

## Sheet: Fig 1-figure supplement 2D
Figure 1-figure supplement 2D source data
		resting OT-I			activated OT-I			liver
AUC:		0.627128	subunits		3.23759	40S/60S		3.80292	subunits
		3.41335	mono		8.79919	80S		7.66678	mono
		1.50116	poly		8.11554	poly		14.135	poly
fractions:		0.113167	40S/60S		0.160656	40S/60S		0.148524	40S/60S
		0.615946	monosomes		0.436634	monosomes		0.299429	monosomes
		0.270888	polysomes		0.40271	polysomes		0.552047	polysomes
percentage:		11.3167	40S/60S		16.0656	40S/60S		14.8524	40S/60S
		61.5946	monosomes		43.6634	monosomes		29.9429	monosomes
		27.0888	polysomes		40.271	polysomes		55.2047	polysomes
