# Supplementary material for: Paradoxical imbalance between activated lymphocyte protein synthesis capacity and rapid division rate
Source: eLife. 2024 Mar 21;12:RP89015. doi: 10.7554/eLife.89015 (PMC10957176; doi:10.7554/eLife.89015)
Supplement: Figure 2—source data 1. [file elife-89015-fig2-data1.xlsx]

## Sheet: Figure 2B source data
Figure 2B source data
Time (s)	HAR	HAR + EME
1044	5875
348	11589
214	20086
179	20377
144	25156
109	28947
74	35422
38	52575
1045		56894
350		50403
214		51179
179
143		51736
108		49507
73		52252
37		51982

## Sheet: Figure 2D source data
Figure 2D source data
far left
Time (s)	HAR	HAR + EM
1043	1165
348	1800
213	2034
178	2479
143	2774
108	3033
72	2953
37	3095
1041		2681
346		3436
212		3612
177		4033
142		4122
107		4442
73		4303
38		5116
mid left
Time (s)	HAR	HAR + EM
1044	817
349	1440
214	1766
178	2046
143	2416
108	2886
73	3449
38	4103
1046		3260
351		4235
215		4142
179		4679
144		4705
109		4824
73		4667
38		5022
mid right
Time (s)	HAR	HAR + EM
1038	639
343	895
209	1724
175	2151
140	2940
106	4498
72	5636
38	7054
1038		2872
344		3949
209		4181
174		2995
140		3973
105		4730
71		4600
37		5180
far right
D1 -PI	100	237	201
D1 +PI	88	71	40
D5 +PI	70	60	93
far right - statistics
Number of families	1
Number of comparisons per family	3
Alpha	0.05
Tukey's multiple comparisons test	Mean Diff.	95.00% CI of diff.	Below threshold?	Summary	Adjusted P Value
D1 -PI vs. D1 +PI	113	1.684 to 224.3	Yes	*	0.0472	A-B
D1 -PI vs. D5 +PI	105	-6.316 to 216.3	No	ns	0.062	A-C
D1 +PI vs. D5 +PI	-8	-119.3 to 103.3	No	ns	0.9737	B-C
Test details	Mean 1	Mean 2	Mean Diff.	SE of diff.	n1	n2	q	DF
D1 -PI vs. D1 +PI	179.3	66.33	113	36.28	3	3	4.405	6
D1 -PI vs. D5 +PI	179.3	74.33	105	36.28	3	3	4.093	6
D1 +PI vs. D5 +PI	66.33	74.33	-8	36.28	3	3	0.3118	6

## Sheet: Figure 2E source data
Figure 2E source data
left
Time (s)	HAR	HAR + EM
1060	94
361	128
222	187
152	216
83	440
13	376
0	650
1063		86
362		76
223		105
153		78
85		83
16		51
0		118
middle
Time (s)	HAR	HAR + EM
1065	292
365	406
226	690
155	1130
86	3113
17	4597
0	6651
1064		256
362		309
222		329
152		318
83		434
13		334
0		395
right
D1 -PI		53	102	75
D1 +PI		96	63	89
right - statistics
Table Analyzed	panel E right
Column B	D1 +PI
vs.	vs.
Column A	D1 -PI
Unpaired t test
P value	0.7471
P value summary	ns
Significantly different (P < 0.05)?	No
One- or two-tailed P value?	Two-tailed
t, df	t=0.3455, df=4
How big is the difference?
Mean of column A	76.67
Mean of column B	82.67
Difference between means (B - A) ± SEM	6.000 ± 17.37
95% confidence interval	-42.21 to 54.21
R squared (eta squared)	0.02898
F test to compare variances
F, DFn, Dfd	1.992, 2, 2
P value	0.6684
P value summary	ns
Significantly different (P < 0.05)?	No
Data analyzed
Sample size, column A	3
Sample size, column B	3
