# Supplementary material for: Paradoxical imbalance between activated lymphocyte protein synthesis capacity and rapid division rate
Source: eLife. 2024 Mar 21;12:RP89015. doi: 10.7554/eLife.89015 (PMC10957176; doi:10.7554/eLife.89015)
Supplement: Figure 3—source data 1. [file elife-89015-fig3-data1.xlsx]

## Sheet: Figure 3A source data
Figure 3 source data
left
	+HAR	+HAR +EM
1043	898
348	973
213	1053
178	1015
143	1032
108	1092
73	1237
39	1478
1044		1307
349		1576
214		1769
179		1804
144		1680
109		1551
74		1698
39		1781
middle
Time (s)	+HAR	+HAR +EM
1047	1227
352	1342
217	1069
183	1096
148	1045
153	1124
77	1064
43	1042
1047		1167
352		1198
217		1196
181		1165
146		1335
151		1257
75		1226
40		1085
right
Time (s)	+HAR	+HAR +EM
1046	1549
351	2891
215	4713
180	6214
145	9468
150	14662
74	20885
39	27798
1044		17773
350		19585
214		20506
179		20623
144		21295
109		21441
74		22418
39		23104

## Sheet: Figure 3B source data
Figure 3B source data
	37°C				39.5°C				37°C				39.5°C				37°C				39.5°C				37°C				39.5°C
24	74.74				62.19					73.28				54.85					84.42				66.83					79.61				54.83
48	76.74				54.43					80.58				75.35					75.33				52.44					83.06				65.1
	24 hours - statistics				48 hours - statistics
	Table Analyzed	1/2 life 37 39.5 stats			Table Analyzed	1/2 life 37 39.5 stats
	Column B	24 39.5			Column E	48 39.5
	vs.	vs.			vs.	vs.
	Column A	24 37			Column D	48 37
	Paired t test				Paired t test
	P value	0.0053			P value	0.0252
	P value summary	**			P value summary	*
	Significantly different (P < 0.05)?	Yes			Significantly different (P < 0.05)?	Yes
	One- or two-tailed P value?	Two-tailed			One- or two-tailed P value?	Two-tailed
	t, df	t=7.307, df=3			t, df	t=4.164, df=3
	Number of pairs	4			Number of pairs	4
	How big is the difference?				How big is the difference?
	Mean of differences (B - A)	-18.34			Mean of differences (E - D)	-17.1
	SD of differences	5.019			SD of differences	8.212
	SEM of differences	2.509			SEM of differences	4.106
	95% confidence interval	-26.32 to -10.35			95% confidence interval	-30.16 to -4.031
	R squared (partial eta squared)	0.9468			R squared (partial eta squared)	0.8525
	How effective was the pairing?				How effective was the pairing?
	Correlation coefficient (r)	0.5893			Correlation coefficient (r)	0.7637
	P value (one tailed)	0.2053			P value (one tailed)	0.1181
	P value summary	ns			P value summary	ns
	Was the pairing significantly effective?	No			Was the pairing significantly effective?	No
