# Supplementary material for: Paradoxical imbalance between activated lymphocyte protein synthesis capacity and rapid division rate
Source: eLife. 2024 Mar 21;12:RP89015. doi: 10.7554/eLife.89015 (PMC10957176; doi:10.7554/eLife.89015)
Supplement: Figure 4—figure supplement 1—source data 1. [file elife-89015-fig4-figsupp1-data1.xlsx]

## Sheet: Fig 4-figure supplement 1A
Figure 4-supplement figure 1A source data
min	puromycin		puromycin and CHX
0	3573	3195	2051	2077
2	3410	3134	1937	1900
30	16053	16814	1824	1973
60	16154	16530	2985	2415

## Sheet: Fig 4-figure supplement 1B
Figure 4-supplement figure 1B source data
	CD45+ cells	CD4+ T cells	CD8+ T cells	NK1.1+CD3- cells	NK1.1+CD3+ cells	CD19+CD3- B cells	CD11b+Gr1- cells	Gr1+CD11b- cells
	2495	2498	1668	1245	2555	2564.5	2317.5	2420
	2543.67	2686.83	2283.08	2425.58	1628	2496.92	3373	3721

## Sheet: Fig 4-figure supplement 1E
Figure 4-supplement figure 1E source data
uninf	day 1	day 2	day 3
71493	46628	2992	619
71837	46693	2271	692

## Sheet: Fig 4-figure supplement 1F
Figure 4-supplement figure 1F source data
uninf	day 1	day 2	day 3
2860	36303	28886	18768
2111	60445	16678	12754
