# Supplementary material for: Paradoxical imbalance between activated lymphocyte protein synthesis capacity and rapid division rate
Source: eLife. 2024 Mar 21;12:RP89015. doi: 10.7554/eLife.89015 (PMC10957176; doi:10.7554/eLife.89015)
Supplement: Figure 4—source data 1. [file elife-89015-fig4-data1.xlsx]

## Sheet: Figure 4B source data
Figure 4B source data
left
seconds	RPM (MFI)
0	41143
0	41873
0	39425
0	42912
120	20437
116	19786
128	12809
304	2878
306	2413
315	3381
601	1143
600	1295
610	1178
middle
seconds	RPM (MFI)
0	1558.4
0	1899.4
0	1850.4
0	1785.4
120	712.4
116	761.4
128	508.4
304	203.4
306	128.4
315	212.4
601	28.7
600	55.5
610	84.1
right
seconds	RPM (MFI)
0	1931.05
0	2271.05
0	2235.05
0	2127.05
120	1075.05
116	1062.05
128	662.05
304	286.05
306	140.05
315	246.05
601	105.05
600	63.85
610	111.05

## Sheet: Figure 4C source data
Figure 4C source data
top left
seconds	corr. RPM MFI
121	47.99
34	44.0425
56	57.9774
238	8.31078
866	4.8188
0	90.7915
30	70.6449
73	48.0296
136	27.2691
600	3.21473
0	47.8645
614	1.7955
217	8.86527
30
43
125	18.8659
123	13.3936
58	21.3545
231	4.35672
0	100
31	42.1678
65	13.9415
120	6.11261
0	80.3617
597	0
247	6.0136
40	53.6519
82	40.2389
696
118	18.8298
270	9.70676
710	0
0	96.3209
0	71.3684
36
753	2.74233
56
0	96.7961
845	3.33967
307
579
118	31.8355
264	8.36275
132
32	100
59	38.99
63	60.7657
132
332
0	81.9576
28	60.9277
58	39.6168
657	0.39286
677	0
138	26.5146
241	9.24943
646	2.48811
35	100
141	15.9763
59	68.3576
233	0.482459
0	89.5031
122	20.3805
236
62	48.6457
51	28.2445
25
653	2.1435
33	62.6439
251	7.80205
157
117	16.1348
0	62.7335
0
123
0
0	68.8018
31	53.0094
54	35.312
119	31.9161
692	12.6173
0	55.8807
288	18.6361
24	68.2772
56	32.3026
124	28.4925
258	23.9923
0	100
759	13.7493
28	35.947
72	29.873
0	77.1397
118	20.6792
676	25.0966
282	1.27002
33	35.3948
68	22.7499
111	8.69685
256	3.75483
678	0
0	64.4671
top right
seconds	corr. RPM MFI
121	44.7783
34	47.2103
56	62.4464
238	15.9514
866	13.5908
0	94.4921
30	73.4621
73	69.9571
136	37.196
600	16.8813
0	74.1774
614	14.2346
217	17.8827
30
43
125	24.6781
123	19.0987
58	30.186
231	14.02
0	100
31	57.6538
65	24.4635
120	12.0172
0	74.8212
597	0
247	7.08155
40	89.5056
82	43.9722
696
118	43.1917
270	36.34
710	7.71899
0	86.4701
0	42.5846
36	79.9653
753	11.882
56
0	100
845	20.2949
307	23.6774
579
118	33.3912
264	8.93322
132	47.0078
32	85.3426
59	71.1188
63	55.0737
132	0.173461
332	0
0	59.0633
28	90.3911
58	55.419
657	4.30168
677	0
138	32.1229
241	20.1117
646	9.32961
35	86.1453
141	25.6425
59	73.352
233	1.78771
0	100
122	19.9441
236	9.16201
62	53.8547
51	53.2961
25
653	10.2793
33	63.4078
251	8.43575
157
117	18.6592
0	76.648
0
123	13.2961
0	57.5419
0	98.6042
31	71.9342
54	62.7119
119	40.1795
692	8.42473
0	100
288	26.67
24	82.652
56	63.2602
124	33.2502
258	21.6351
0	69.342
759	15.653
28	51.6451
72	44.2672
0	39.1825
118	25.8225
676	0
282	12.5125
33	40.7777
68	34.6461
111	21.336
256	9.07278
678	7.17846
0	40.7278
bottom left
seconds	corr. RPM MFI
64	46.7404
36	43.9954
71	14.7922
36	26.5345
33	26.2295
35	28.7266
66	33.2634
59	37.4571
127	32.8631
505	0
123	26.4011
121	23.6371
472	0.80061
251	15.2878
254	9.68357
389	4.74647
357	8.17766
256	0.400305
234	5.4899
0	86.2562
0	42.0892
0	55.3374
0	100
31	43.2908
689	0
33	43.1977
36	43.9333
68	16.1281
63	35.2826
27	21.9294
249	16.5472
821	1.24779
71	38.3276
65	52.2488
117	31.502
672	1.67613
	0.875314
136	21.0262
116	20.8027
230	18.7075
721	3.98547
646	0.288667
243	5.05634
277	6.32275
0	100
0	51.9508
0	50.7775
0	100
31	65.1511
126	8.03691
250	6.68628
0	90.8264
242	13.6668
64
132	13.5197
31	65.3651
597	2.00588
608	3.47687
128	21.7572
61
30	52.835
593	4.89436
70	45.3463
237	6.76652
48	21.2757
723	9.28056
133	25.0067
30	55.1351
360	0
115	15.9267
251	4.98796
0	73.9904
0	74.4718
bottom right
seconds	corr. RPM MFI
64	75.1901
36	60.1711
71	28.8973
36	39.4487
33	47.0532
35	28.8973
66	46.1977
59	60.5513
127	39.0684
505	5.03802
123	33.365
121	30.2281
472	5.13308
251	17.8707
254	17.8707
389	9.41065
357	17.1103
256	0
234	12.9278
0	84.2205
0	70.2471
0	83.5551
0	100
31	72.1887
689	5.37575
33	63.7959
36	53.8673
68	29.7861
63	50.7405
27	36.8075
249	23.4778
821	1.26166
71	47.3396
65	48.0527
117	35.6007
672	7.89907
136	28.5244
116	31.4866
230	3.83982
721	14.2622
646	4.88206
243	8.94131
277	8.28305
0	100
0	89.6325
0	90.181
0	100
31	79.4544
126	22.751
250	14.2194
0	86.6512
242	20.5456
64
132	23.5055
31	79.3964
597	11.0853
608	5.22345
128	25.2467
61
30	49.8549
593	13.9872
70	53.6854
237	15.6703
48	33.4881
723	15.09
133	27.1619
30	56.5873
360	0
115	16.2507
251	6.55833
0	68.8915
0	78.2937
