# Supplementary material for: Paradoxical imbalance between activated lymphocyte protein synthesis capacity and rapid division rate
Source: eLife. 2024 Mar 21;12:RP89015. doi: 10.7554/eLife.89015 (PMC10957176; doi:10.7554/eLife.89015)
Supplement: Figure 5—figure supplement 1—source data 1. [file elife-89015-fig5-figsupp1-data1.xlsx]

## Sheet: Fig 5-figure supplement 1A
Figure 5-figure supplement 1A source data
	CD69, 24h						CD69, 48h						CD25, 24h						CD25, 48h						CD44, 24h						CD44, 48h						SSCa, 24h						SSCa, 48h						exp.index, 24h
PMA/iono	0.47	0.77	0.55	0.55	0.53		0.17	0.5	0.22	0.2	0.22		0.32	0.37	0.38	0.4	0.4		0.03	0.24	0.02	0.15	0.15		0.4	0.19	0.24	0.52	0.69		0.28	0.34	0.24	0.34	0.37		0.84	0.3	0.53	0.79	0.88		0.42	0.89	0.6	0.51	0.42		0.11
PMA/iono + SIINFEKL	1	0.96	0.89	1	1		0.43	1	1	0.23	0.42		0.62	0.44	0.52	0.54	0.58		1	1	1	1	1		0.74	0.17	0.33	0.8	1		1	1	1	1	0.83		0.98	0.35	0.74	0.94	1		1	1	1	1	0.83		0.11
[truncated: 11 more columns]

## Sheet: Fig 5-figure supplement 1B
Figure 5-figure supplement 1B source data
cell diameter (μM)	SSCa (EMA-)
10.7	95624.6
10.1	82951.8
9.4	68679
10.2	84399
10.8	94017.8
10.5	97835
10.9	98134.8
10.9	100263
10.2	80355.4
10.8	98070
9.9	74954.8
11.2	101495
10.4	79744.6
11.3	106857
9.7	75080
11.6	107237
7.7	34207.9
6.9	34684.6
11.3	121496
11.5	104824
8.5	65134.2
8.9	70074.4
9.5	104684
11	111310
10.1	110820
11.1	100306
9.8	108212
11.3	112648
10.3	111105
11.1	112558
10.6	101551
12.2	123089
10.2	96097
11.8	113942
7.5	42934.2
7.1	36443.1
7	39399.2
7.3	40204.1
9.9	103468
10.8	110670
9.4	76151.9
11.1	115262
10.2	94773.3
11.3	99907.9
9.9	97430.6
10.9	100020
9.7	80692.9
11.4	110736
9.1	72504.2
10.4	96103.9
9.2	73953
11.2	139022
9.1	78305
11.5	135530
9.9	106667
10.9	115117
9.6	77174.6
11.1	120133
7.6	47171.8
7.7	49561.8
7.5	43557.7
7	46863.7
11.5667	88530
11.2	97098.8
10.6667	95192
11.4	127210
