# Supplementary material for: Paradoxical imbalance between activated lymphocyte protein synthesis capacity and rapid division rate
Source: eLife. 2024 Mar 21;12:RP89015. doi: 10.7554/eLife.89015 (PMC10957176; doi:10.7554/eLife.89015)
Supplement: Figure 6—source data 1. [file elife-89015-fig6-data1.xlsx]

## Sheet: Figure 6 source data
Figure 6 source data
	Cell sizes and protein calculations (only cells used for assays)
							11598600	pg -> # molecules conversion	---> 6.022e23 / 1000 / 1000 / 1000 / 1000 / 51920
									(51920 g/mol = average 472aa protein at 110 Da/aa)
			diameter	calculated volume	protein conc		#protein molecules/fL
			micron	micron^3	pg/cell
121517	resting LN	OT-1's	7.9	258.154	20.6522		927882
122017	LN	Rest	7.1	187.402	30.851		1.90942e+06
122017	LN2	Rest	6.9	172.007	31.3952		2.11701e+06
122017	LN3	Rest	7.6	229.847	32.9779		1.66414e+06
21618	LN	Rest	7	179.594	19.3527		1.24984e+06
22818	LN	Rest	7.2	195.432	46.7125		2.77232e+06
122017	SPL	Rest	8.4	310.339	37.78		1.41199e+06
122017	SPL2	Rest	7.4	212.175	36.9		2.01715e+06
122017	SPL3	Rest	8.2	288.695	45.72		1.83684e+06
21618	SPL	Rest	7.6	229.847	20.5762		1.03832e+06
22818	SPL1	Rest	7.9	258.154	79.7915		3.58495e+06
22818	SPL2	Rest	7.6	229.847	33.0643		1.6685e+06
121517	D1 LN	OT-1's	10	523.598	150.01		3.32299e+06
122117	LN1	D1	11	696.909	165.784		2.75913e+06
122117	LN2	D1	10.9	678.075	251.823		4.30747e+06
122117	LN3	D1	10.8	659.583	205.738		3.61785e+06
121517	D1 SPL1	OT-1's	11	696.909	187.52		3.12088e+06
121517	D1 SPL2	OT-1's	11.1	716.089	201.388		3.26191e+06
121517	D1 SPL3	OT-1's	10.6	623.614	167.064		3.10722e+06
122117	SPL1	D1	10.1	539.464	127.805		2.74784e+06
122117	SPL2	D1	11.4	775.734	125.419		1.87524e+06
122117	SPL3	D1	10.1	539.464	177.321		3.81244e+06
121617	LN	D2	10.7	641.43	135.963		2.45854e+06
122217	LN1	D2	11	696.909	195.332		3.25089e+06
122217	LN2	D2	10.5	606.131	157.541		3.01463e+06
122217	LN3	D2	11	696.909	114.595		1.90719e+06
121617	SPL1	D2	10.4	588.977	149.743		2.94886e+06
121617	SPL2	D2	10.5	606.131	200.723		3.84093e+06
121617	SPL3	D2	10.2	555.647	168.032		3.5075e+06
122217	SPL1	D2	11	696.909	238.617		3.97128e+06
122217	SPL2	D2	11.6	817.283	250.056		3.54872e+06
122217	SPL3	D2	11.2	735.618	246.958		3.89382e+06
HeLa 1 (for TRP) (121416)		HeLa	15.8	2065.24	313.683		1.76168e+06
HeLa 2 (for TRP) (121416)		HeLa	15.7	2026.27	283.839		1.62473e+06
HeLa 3 (for TRP) (121416)		HeLa	15.8	2065.24	326.197		1.83196e+06
21618	HeLa	HeLa	18	3053.63	496.435		1.88561e+06
21618	HeLa	HeLa	17.9	3003.01	471.179		1.81985e+06
21618	HeLa	HeLa	18	3053.63	487.474		1.85158e+06
2018-05-31	HeLa 19	HeLa	15.6	1987.8	647.63		3.77886e+06
2018-05-31	HeLa 20	HeLa	16.8	2482.71	681.475		3.18368e+06
2018-05-31	HeLa 21	HeLa	15.5	1949.81	741.721		4.41217e+06
	ex vivo	081017 sort	11	696.909	211.723		3.52368e+06
	ex vivo	070717 sort	10.0667	534.14	184.87		4.01437e+06
	ex vivo	Sort 1 (082516)	9.4	434.892	80.2379		2.13995e+06
	ex vivo	Sort 2 (102416)	10.875	673.42	126.718		2.18252e+06
	ex vivo	Sort 3 (121216)	10.9	678.075	180.409		3.08593e+06
	Bioanalyzer Ribosome Counts
			cell size	calculated volume	protein conc	# molecules	# molecules	#protein molecules/fL	#ribosomes/fL	proteins/ribosome	ave protein/rib	doubling time	doubling time
			micron	micron^3	pg/cell	18s	28s					seconds	hours
121517	resting LN	OT-1's	7.9	258.154	20.6522	158271	155704	927882	603.145	1538.41	1515.3	121021	33.6171
122017	resting LN	OT-1's	7.1	187.402	30.851	194970	140812	1.90942e+06	751.389	2541.19		199907	55.5297
122017	rest LN2	OT-1's	6.9	172.007	31.3952	291911	284810	2.11701e+06	1655.81	1278.54		100578	27.9384
21618	resting LN	OT-1's	7	179.594	19.3527	255426	256592	1.24984e+06	1428.73	874.792		68816.9	19.1158
22818	resting LN	OT-1's	7.2	195.432	46.7125	756240	516896	2.77232e+06	2644.89	1048.18		82456.7	22.9046
122017	resting SPL2	OT-1's	7.4	212.175	36.9	348440	274712	2.01715e+06	1294.75	1557.95		122559	34.0441
22818	resting SPL2	OT-1's	7.6	229.847	33.0643	180171	216905	1.6685e+06	943.692	1768.05		139087	38.6353
121517	D1 LN	OT-1's	10	523.598	150.01	5.00629e+06	4.18708e+06	3.32299e+06	7996.74	415.543	632.045	32689.4	9.08038	13.8114	day 1 act
122117	D1 LN1	OT-1's	11	696.909	165.784	2.1071e+06	1.89496e+06	2.75913e+06	2719.09	1014.72		79824.9	22.1736
122117	D1 LN3	OT-1's	10.8	659.583	205.738	2.54951e+06	2.27288e+06	3.61785e+06	3445.93	1049.89		82591.4	22.9421
121517	D1 SPL1	OT-1's	11	696.909	187.52	6.15622e+06	5.48463e+06	3.12088e+06	7869.94	396.557		31195.8	8.66551
121517	D1 SPL2	OT-1's	11.1	716.089	201.388	5.89871e+06	5.24865e+06	3.26191e+06	7329.6	445.032		35009.2	9.72477
121517	D1 SPL3	OT-1's	10.6	623.614	167.064	4.67106e+06	4.11816e+06	3.10722e+06	6603.7	470.527		37014.8	10.2819
122117	D1 SPL1	OT-1's	10.5	606.131		1.08355e+06	953130		1572.48
121617	D2 LN	OT-1's	10.7	641.43	135.963	4.6232e+06	4.42751e+06	2.45854e+06	6902.55	356.179	460.615	28019.4	7.78317	10.0653	day 2 act
122217	D2 LN1	OT-1's	11	696.909		5.15882e+06	4.4374e+06		6367.25
122117	D2 LN2	OT-1's	10.8	659.583		3.03514e+06	2.68746e+06		4074.49
122217	D2 LN3	OT-1's	10.9	678.075		1.38035e+06	1.21337e+06		1789.44
121617	D2 SPL1	OT-1's	10.4	588.977	149.743	3.62757e+06	3.16387e+06	2.94886e+06	5371.8	548.952		43184.2	11.9956
121617	D2 SPL2	OT-1's	10.5	606.131	200.723	5.23782e+06	4.45987e+06	3.84093e+06	7357.93	522.012		41065	11.4069
121617	D2 SPL3	OT-1's	10.2	555.647	168.032	5.45249e+06	4.69262e+06	3.5075e+06	8445.33	415.318		32671.7	9.07547
7817		HeLa	15.6	1987.8		4.25222e+06	3.24017e+06		1630.03		910.133			19.8881	HeLa
21618		HeLa	18	3053.63	496.435	8.18205e+06	6.8803e+06	1.88561e+06	2253.16	836.874		65834.1	18.2873
21618		HeLa	17.9	3003.01	471.179	6.81706e+06	6.27245e+06	1.81985e+06	2088.72	871.274		68540.2	19.039
21618		HeLa	18	3053.63	487.474	5.85385e+06	5.53095e+06	1.85158e+06	1811.27	1022.25		80417.1	22.3381
70717	sort	OT-1's	10.0667	534.14	184.87	3.03444e+06	2.14237e+06	4.01437e+06	4010.87	1000.87	1017.34	78735.2	21.8709	22.2307	ex vivo day 2
81017	sort	OT-1's	11	696.909	211.723	3.12887e+06	2.37539e+06	3.52368e+06	3408.46	1033.8		81325.9	22.5905
